# Supplementary material for: Supramolecular forces and their interplay in stabilizing complexes of organic anions: tuning binding selectivity in water
Source: Royal Society of Chemistry journal article supplement (doi:10.1039/c8qo01152d), 2018-11-20
Supplement: c8qo01152d1.pdf [file c8qo01152d1.pdf]

## *Supporting Information*

### **Supramolecular Forces and Their Interplay in Stabilizing Complexes of Organic Anions: Tuning Binding Selectivity in Water.**

Matteo Savastano, Carla Bazzicalupi, Celeste García-Gallarín, Maria Dolores López de la Torre,  
Antonio Bianchi,\* Manuel Melguizo\*

# Table of Contents

|                                                                                                                                                                                                                                                                                |    |
|--------------------------------------------------------------------------------------------------------------------------------------------------------------------------------------------------------------------------------------------------------------------------------|----|
| <b>Table S1.</b> Ligands and anions protonation constants. ....                                                                                                                                                                                                                | S3 |
| <b>Table S2.</b> Crystal data and structure refinement for $(\text{H}_2\text{L})(\text{HPhthalate})_2 \cdot 2\text{H}_2\text{O}$ , $(\text{H}_2\text{L})(\text{HIsophthalate})_2$ and $\text{H}_2\text{L}2(\text{C}_6\text{H}_5\text{SO}_3)_2 \cdot \text{H}_2\text{O}$ . .... | S4 |
| <b>Figure S1.</b> $^1\text{H}$ NMR spectra of studied anions with L1. ....                                                                                                                                                                                                     | S5 |
| <b>Figure S2.</b> Selectivity diagrams. ....                                                                                                                                                                                                                                   | S6 |
| <b>Figure S3.</b> pH dependence of conditional stability constants for complexes of L1 and L2 with phthalate and isophthalate anions. ....                                                                                                                                     | S7 |
| <b>Figure S4.</b> $^1\text{H}$ NMR titration performed by adding benzenesulfonate to L1. ....                                                                                                                                                                                  | S8 |

**Table S1.** Ligands and anions protonation constants determined at  $298.1 \pm 0.1$  K in 0.1 M NMe<sub>4</sub>Cl aqueous solution. Figures in parentheses are standard deviations on the last significant figure.

| <i>Equilibrium</i>               | <i>log K</i>         |
|----------------------------------|----------------------|
| $H^+ + L1 = HL^+$                | 4.45(3) <sup>a</sup> |
| $H^+ + HL1^+ = H_2L1^{2+}$       | 3.45(3) <sup>a</sup> |
| $H^+ + L2 = HL^+$                | 6.19(1) <sup>a</sup> |
| $H^+ + HL2^+ = H_2L^{2+}$        | 5.37(1) <sup>a</sup> |
| $H^+ + CH_3COO^- = CH_3COOH$     | 4.51(1)              |
| $H^+ + C_6H_5COO^- = C_6H_5COOH$ | 4.15(3)              |
| $H^+ + Pht^{2-} = HPht^-$        | 5.10(3)              |
| $H^+ + HPht^- = H_2Pht$          | 2.78(3)              |
| $H^+ + IPht^{2-} = HIPht^-$      | 4.32(1)              |
| $H^+ + HIPht^- = H_2IPht$        | 3.28(1)              |

<sup>a</sup> taken from ref. 9.

**Table S2.** Crystal data and structure refinement for (H<sub>2</sub>L)(HPhthalate)<sub>2</sub>·2H<sub>2</sub>O (a), (H<sub>2</sub>L)(HIsophthalate)<sub>2</sub> (b) and H<sub>2</sub>L2(C<sub>6</sub>H<sub>5</sub>SO<sub>3</sub>)<sub>2</sub>·H<sub>2</sub>O (c).

|                                                  | (a)                                                            | (b)                                                            | (c)                                                                          |
|--------------------------------------------------|----------------------------------------------------------------|----------------------------------------------------------------|------------------------------------------------------------------------------|
| Empirical formula                                | C <sub>30</sub> H <sub>40</sub> N <sub>6</sub> O <sub>12</sub> | C <sub>30</sub> H <sub>36</sub> N <sub>6</sub> O <sub>10</sub> | C <sub>26</sub> H <sub>38</sub> N <sub>6</sub> O <sub>9</sub> S <sub>2</sub> |
| Formula weight                                   | 676.68                                                         | 640.65                                                         | 642.74                                                                       |
| Temperature (K)                                  | 100                                                            | 100                                                            | 100                                                                          |
| space group                                      | <i>C</i> 2/ <i>c</i>                                           | <i>P</i> 2 <sub>1</sub> / <i>n</i>                             | <i>P</i> <i>na</i> 2 <sub>1</sub>                                            |
| <i>a</i> (Å)                                     | 27.337(3)                                                      | 6.8698(1)                                                      | 15.1627(5)                                                                   |
| <i>b</i> (Å)                                     | 6.1593(4)                                                      | 14.4541(3)                                                     | 6.4915(4)                                                                    |
| <i>c</i> (Å)                                     | 20.343(2)                                                      | 14.7842(3)                                                     | 29.4057(9)                                                                   |
| $\alpha$ (°)                                     | 90                                                             | 90                                                             | 90                                                                           |
| $\beta$ (°)                                      | 106.22(1)                                                      | 95.204(2)                                                      | 90                                                                           |
| $\gamma$ (°)                                     | 90                                                             | 90                                                             | 90                                                                           |
| Volume (Å <sup>3</sup> )                         | 3289.0(5)                                                      | 1461.97(5)                                                     | 2894.4(2)                                                                    |
| <i>Z</i>                                         | 4                                                              | 2                                                              | 4                                                                            |
| Independent reflections / R(int)                 | 2918 / 0.0476                                                  | 2719 / 0.0672                                                  | 4695 / 0.0398                                                                |
| $\mu$ (mm <sup>-1</sup> )                        | 0.901/ (Cu-K $\alpha$ )                                        | 0.930/ (Cu-K $\alpha$ )                                        | 2.222/ (Cu-K $\alpha$ )                                                      |
| R indices [ <i>I</i> > 2 $\sigma$ ( <i>I</i> )]* | R1 = 0.0466                                                    | R1 = 0.0513                                                    | R1 = 0.0287                                                                  |
|                                                  | wR2 = 0.1386                                                   | wR2 = 0.1411                                                   | wR2 = 0.0741                                                                 |
| R indices (all data)*                            | R1 = 0.0568                                                    | R1 = 0.0702                                                    | R1 = 0.0311                                                                  |
|                                                  | wR2 = 0.1599                                                   | wR2 = 0.1714                                                   | wR2 = 0.0755                                                                 |

\*  $R1 = \sum ||F_o| - |F_c|| / \sum |F_o|$  ;  $wR2 = [\sum w(F_o^2 - F_c^2)^2 / \sum wF_o^4]^{1/2}$

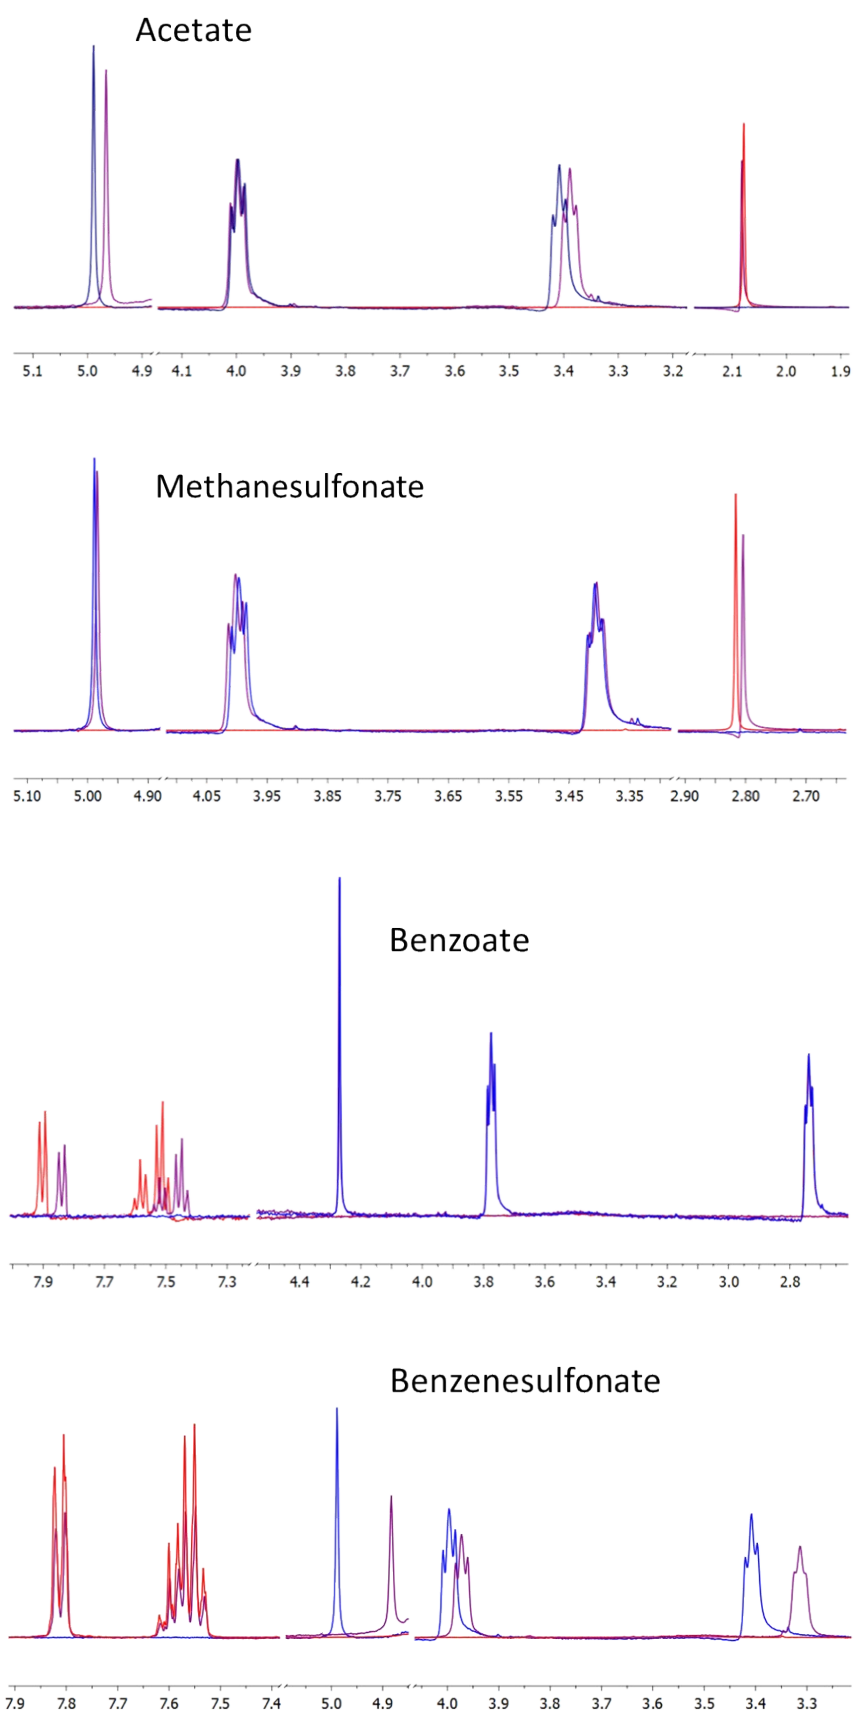

**Figure S1.**  $^1\text{H}$  NMR spectra of studied anions with L1. Colour code: blue: L1 only; red: Substrate only; violet: 1:5 L1:Substrate solution. Working pH as reported in Table 4 for each spectrum. Sample concentrations as reported in the Experimental Section.

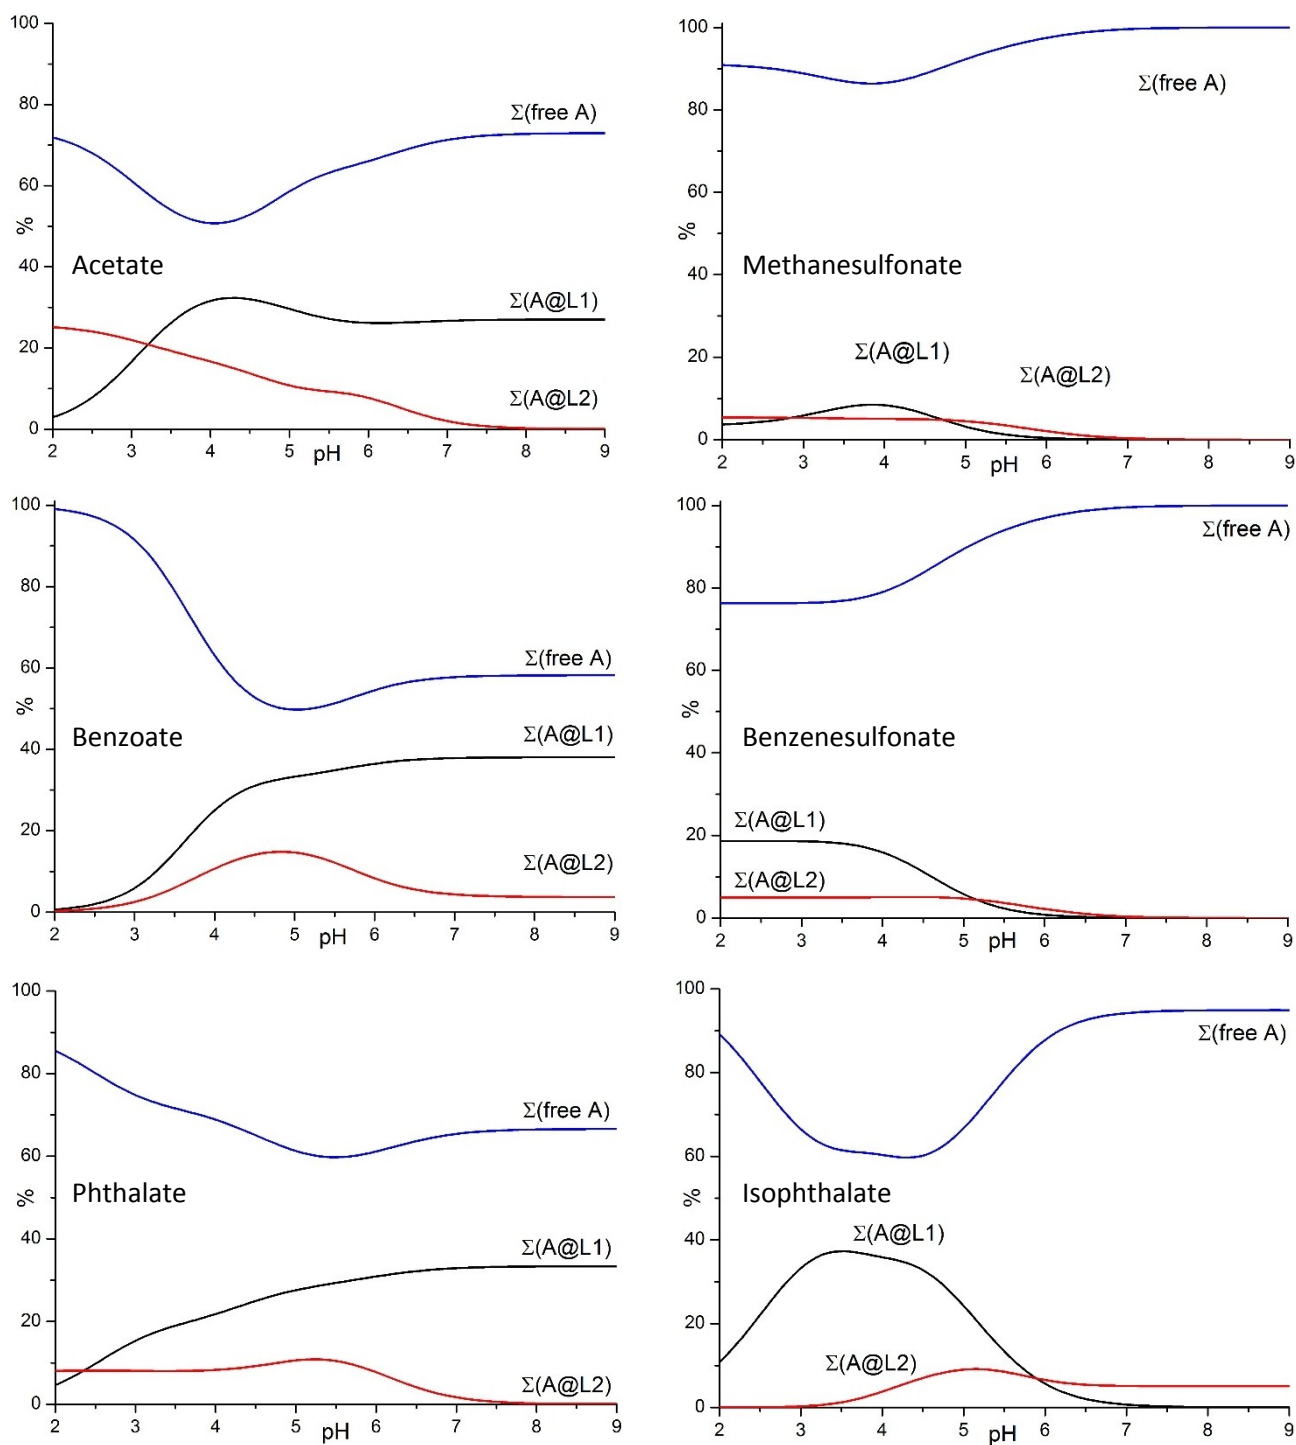

**Figure S2.** Selectivity diagrams showing the percentage of free and bound anion to each ligand as a function of pH:  $\Sigma\text{A@L1}$  = total abundance (%) of L1-A complexes,  $\Sigma\text{A@L2}$  = total abundance (%) of L2-A complexes (sums run over all the possible complex species reported in Tables 2 and 3, for L1 and L2 respectively). Concentration of all reagents is set to 1 mM. Percentages are referred to total anion concentration.

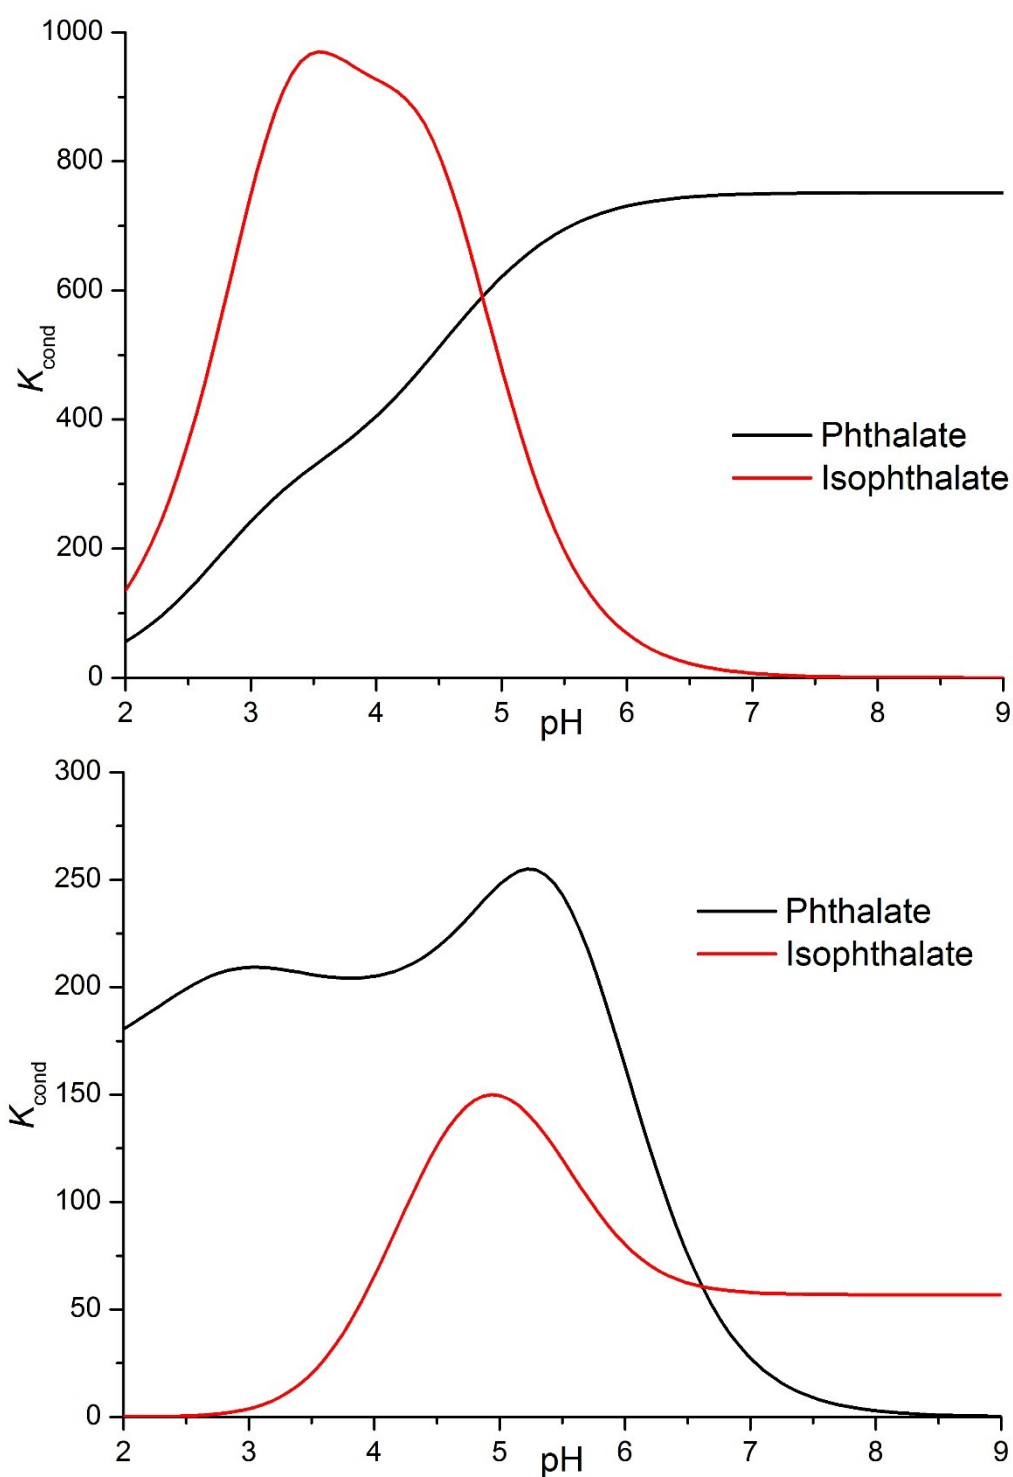

**Figure S3.** Conditional stability constants for complexes of L1 (top) and L2 (bottom) with phthalate and isophthalate anions.  $K_{\text{cond}} = \Sigma[\text{H}_{i+j}\text{LA}]/(\Sigma[\text{H}_i\text{L}]\times \Sigma [\text{H}_j\text{A}])$ , with  $i$  and  $j$  number of acidic protons on the ligand and on the anion, respectively.

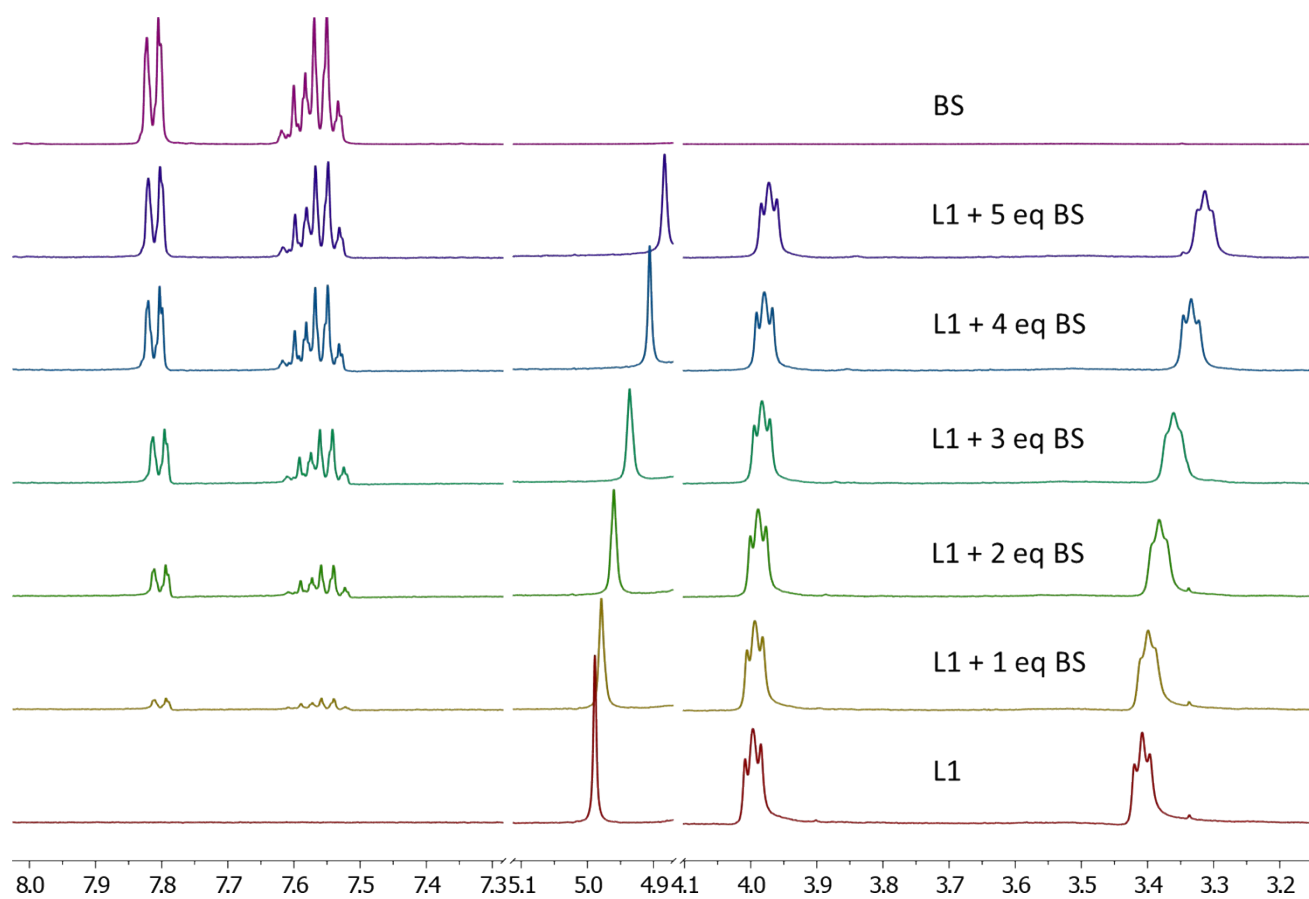

**Figure S4.**  $^1\text{H}$  NMR titration performed by adding benzenesulfonate (BS) to L1. Conditions are given in the Experimental Section.
